# Supplementary material for: Trithiocarbonates prepared from iodo-functionalized RITP-polymers
Source: Royal Society of Chemistry journal article supplement (doi:10.1039/c2py20790g), 2012-10-24
Supplement: c2py20790g.pdf [file c2py20790g.pdf]

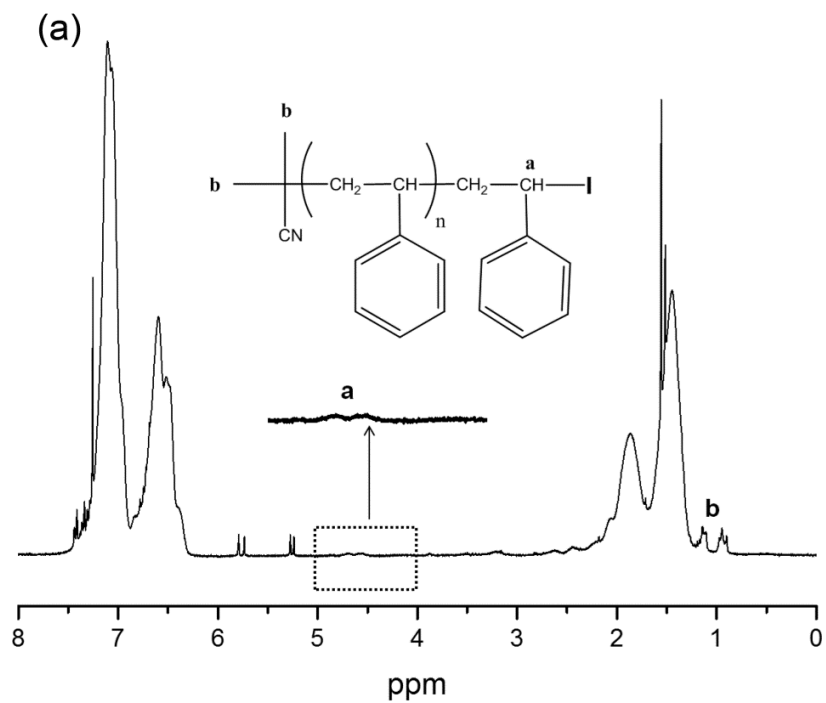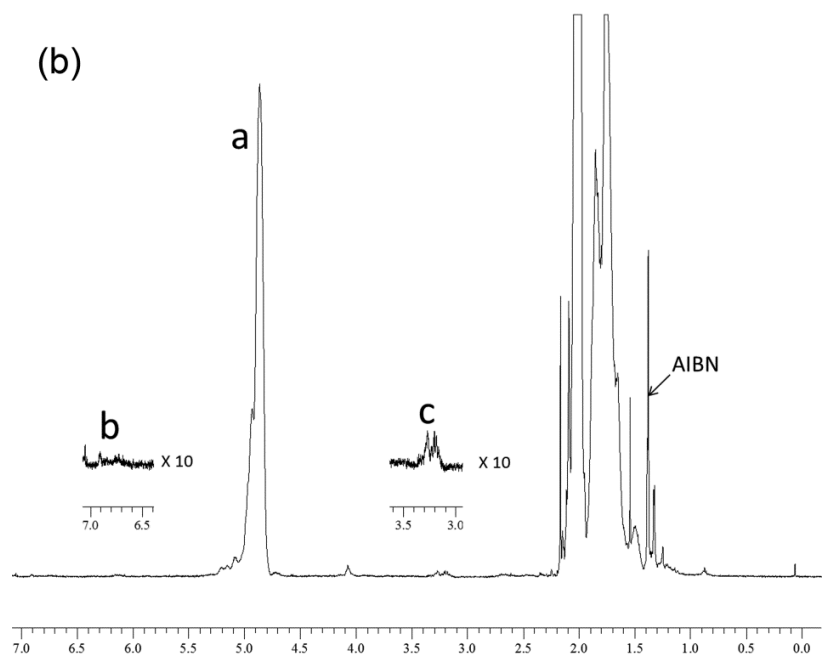

Figure S1. (a)  $^1\text{H}$  NMR spectrum of (top) crude I-TP<sub>3a</sub> and (b) precipitated I-TP<sub>7a</sub> (bottom)

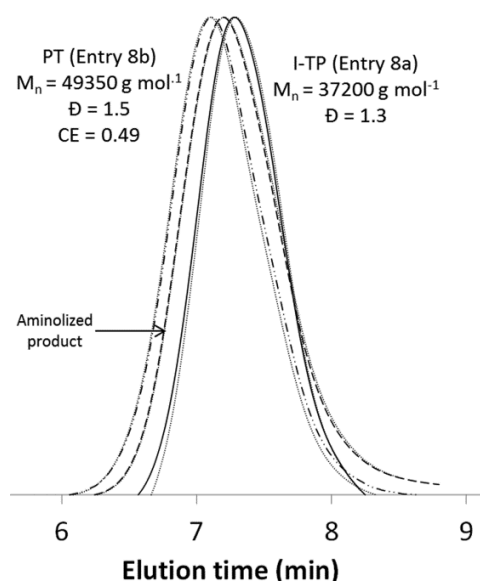

**Figure S2.** SEC traces of poly(butyl acrylate-*b*-styrene) I-TP<sub>8a</sub>, its corresponding PT<sub>8b</sub> and the aminolized product PT<sub>8b</sub>

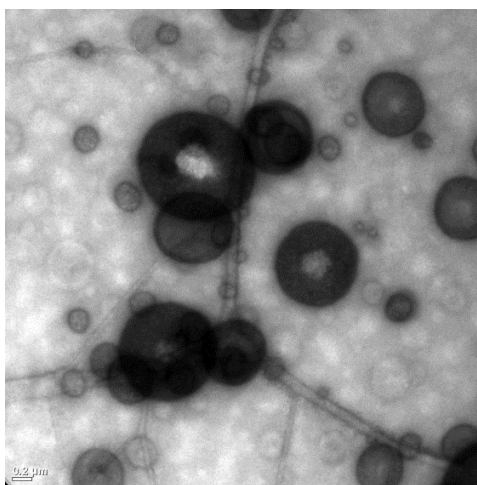

**Figure S3.** TEM, analysis of block copolymer in Entry 6c
